# Supplementary material for: Mediating the alloying depth to tune silicon's morphology and lithium-storage performance
Source: Royal Society of Chemistry journal article supplement (doi:10.1039/d2ta01342h), 2022-01-01
Supplement: d2ta01342h1.pdf [file d2ta01342h1.pdf]

## **Mediating the Alloying Depth to Tune the Silicon's Morphology and Lithium-Storage Performance**

Qiang Ma<sup>a</sup>, Yan Zhao<sup>a</sup>, Yanyang Guo<sup>a</sup>, Zhuqing Zhao<sup>a</sup>, Hongwei Xie<sup>a</sup>, Pengfei Xing<sup>a</sup>, Dihua  
Wang<sup>b</sup>, and Huayi Yin<sup>a,b,c,\*</sup>

- a. Key Laboratory for Ecological Metallurgy of Multimetallic Mineral of Ministry of Education, School of Metallurgy, Northeastern University, Shenyang, 110819, P. R. China.
- b. School of Resource and Environmental Science, Wuhan University, Wuhan, 430072, P. R. China.
- c. Key Laboratory of Data Analytics and Optimization for Smart Industry, Ministry of Education, Northeastern University, Shenyang, 110819, P. R. China.

\* Corresponding author. Email: yinhuayi@whu.edu.cn (Huayi Yin)

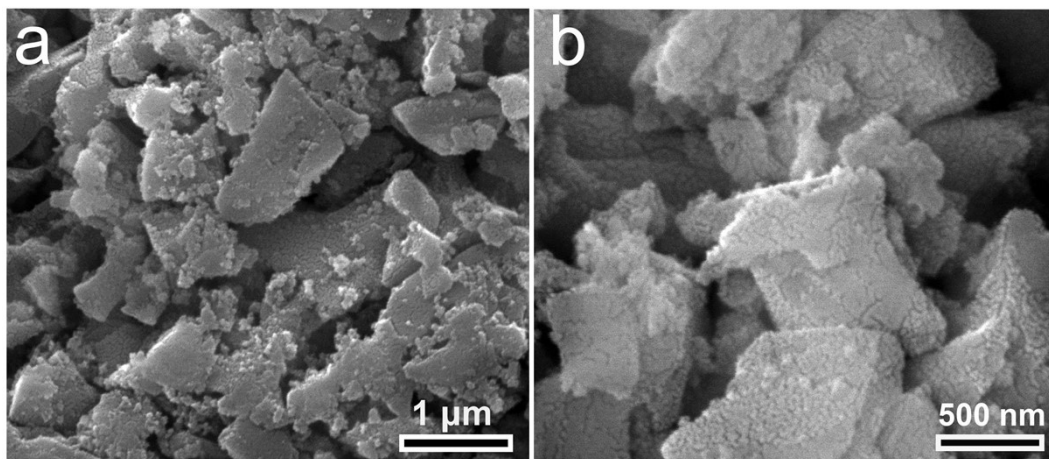

**Figure S1.** SEM images of the np-Si-1 sample under different magnifications.

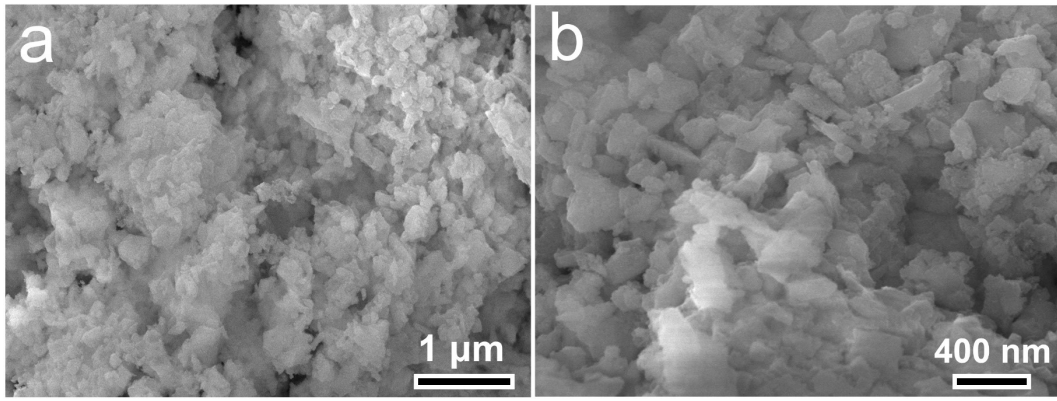

**Figure S2.** SEM images of the np-Si-9 sample under different magnifications.

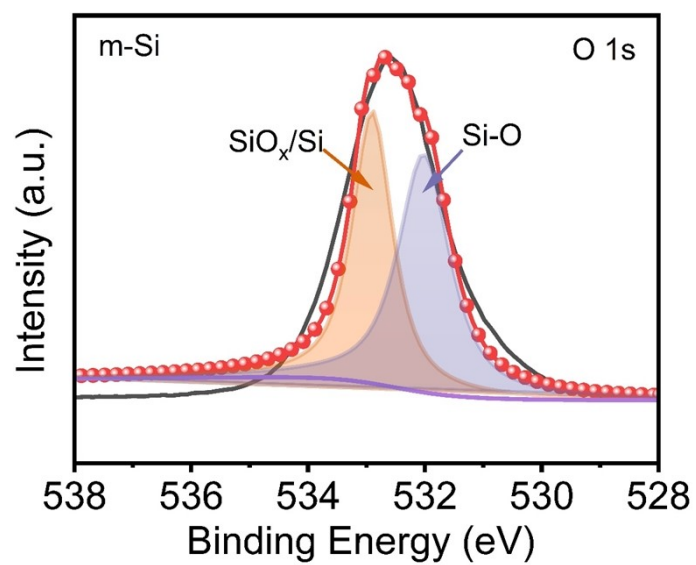

**Figure S3.** The high-resolution spectra of O 1s of the m-Si sample.

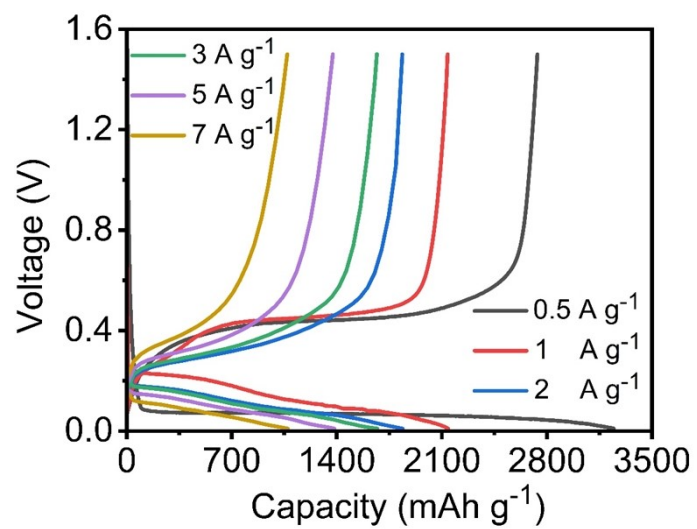

**Figure S4.** Galvanostatic charge/discharge voltage profiles for the np-Si-5 electrode at different current densities from 0.5 to 7 A g<sup>-1</sup>.

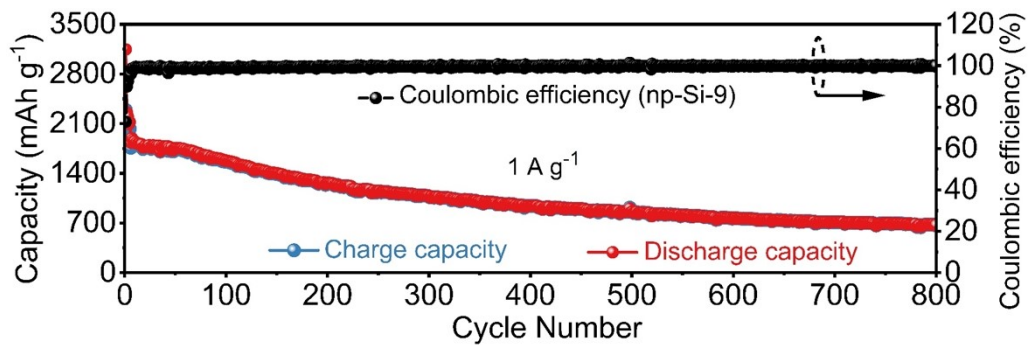

**Figure S5.** Long-time cycling performance and Coulombic efficiency of the np-Si-9 electrode at 1 A g<sup>-1</sup> for LIBs.

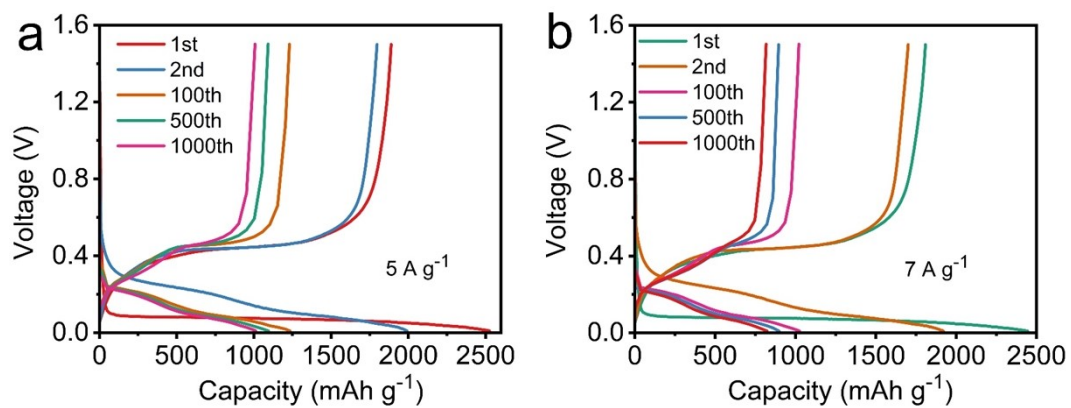

**Figure S6.** Galvanostatic charge/discharge voltage profiles of the np-Si-5 electrode at current densities of (a)  $5 \text{ A g}^{-1}$  and (b)  $7 \text{ A g}^{-1}$ .

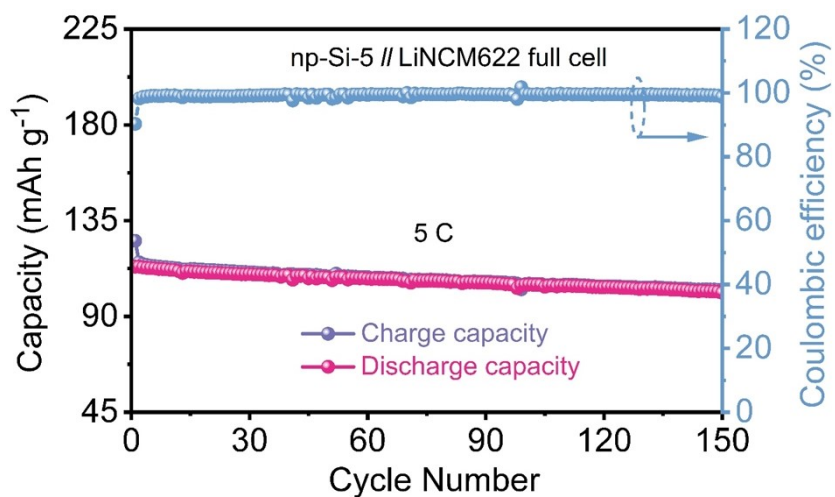

**Figure S7.** Cycling performance of np-Si-5//LiNCM622 full cell at 5 C for 150 cycles.



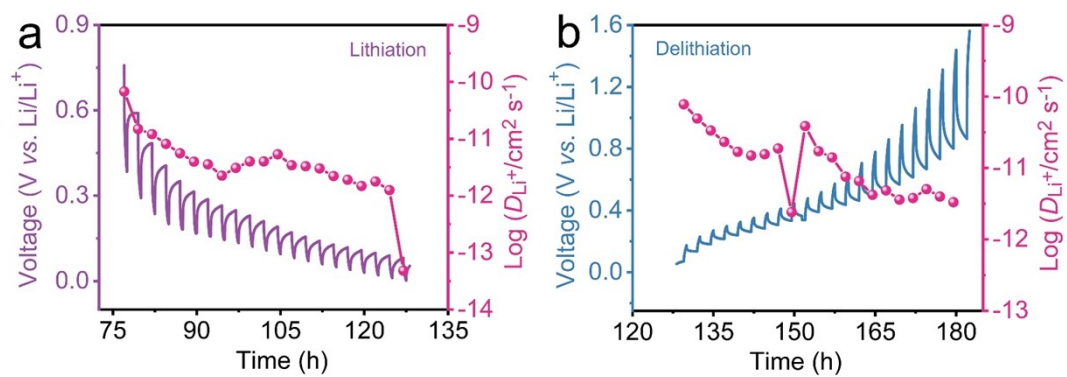

**Figure S8.** GITT potential profiles and corresponding  $D_{Li^+}$  of the m-Si electrode during the (a) lithiation and (b) delithiation processes.

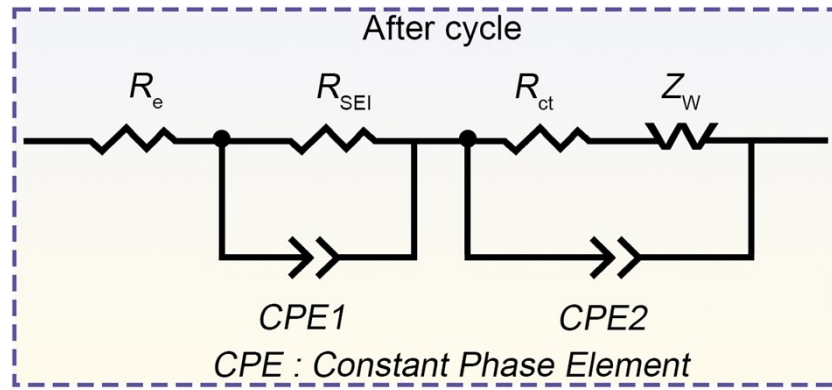

**Figure S9.** Equivalent circuit model of the system.

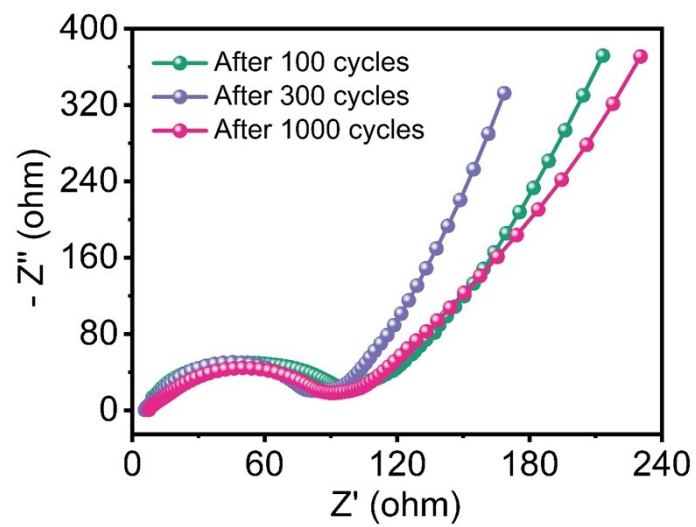

**Figure S10.** Nyquist plots of after 100th, 300th, and 1000th cycles of the np-Si-5 electrode.

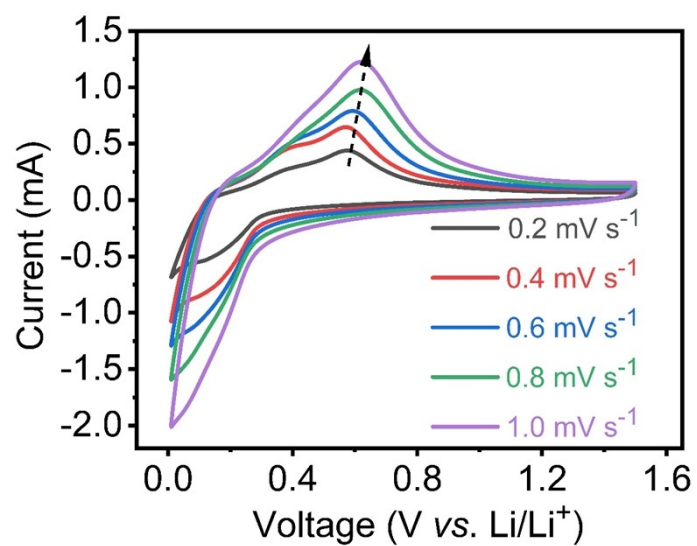

**Figure S11.** CV curves at different scan rates of the m-Si electrode.

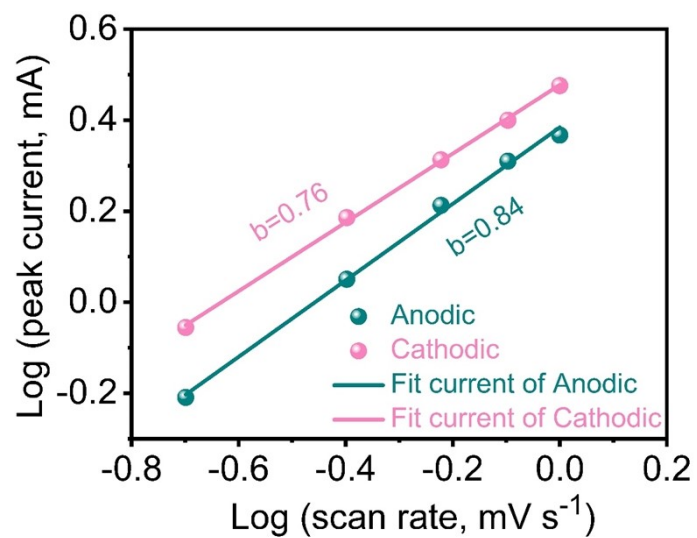

**Figure S12.** Determination  $b$ -value of the main cathodic and anodic peaks of the np-Si-5 electrode by relationship between log (peak current) and log (scan rate).

**Table S1.** Pore structure information for the as-made samples

| Samples | BET analysis                                  |                                                            |                                                           |                                                             |                                                            |                           |                                   |
|---------|-----------------------------------------------|------------------------------------------------------------|-----------------------------------------------------------|-------------------------------------------------------------|------------------------------------------------------------|---------------------------|-----------------------------------|
|         | $S_{\text{BET}}$<br>( $\text{m}^2/\text{g}$ ) | $S_{\text{micro}}^{\text{a}}$<br>( $\text{m}^2/\text{g}$ ) | $S_{\text{meso}}^{\text{b}}$<br>( $\text{m}^2/\text{g}$ ) | $V_{\text{micro}}^{\text{c}}$<br>( $\text{cm}^3/\text{g}$ ) | $V_{\text{meso}}^{\text{d}}$<br>( $\text{cm}^3/\text{g}$ ) | $D_{\text{aver}}$<br>(nm) | $S_{\text{micro}}/S_{\text{BET}}$ |
| m-Si    | 15.29                                         | 2.57                                                       | 11.48                                                     | 0.0012                                                      | 0.06                                                       | 6.8                       | 22.39%                            |
| np-Si-3 | 21.90                                         | 3.04                                                       | 16.93                                                     | 0.0014                                                      | 0.11                                                       | 6.7                       | 17.96%                            |
| np-Si-5 | 41.81                                         | 11.87                                                      | 26.95                                                     | 0.0051                                                      | 0.12                                                       | 5.5                       | 44.04%                            |
| np-Si-7 | 30.87                                         | 6.28                                                       | 22.41                                                     | 0.0031                                                      | 0.11                                                       | 6.1                       | 28.02%                            |

<sup>a)</sup> $S_{\text{micro}}$  and <sup>b)</sup> $S_{\text{meso}}$  are the surface areas of the micropores and mesopores, respectively; <sup>c)</sup> $V_{\text{micro}}$  and <sup>d)</sup> $V_{\text{meso}}$  are the volumes of the micropores and mesopores, respectively.

**Table S2.** Comparison of the electrochemical performance of the as-prepared samples with other Si anode materials for lithium-ion battery.

| Samples             | Method                              | Tests done at/Initial discharge specific capacity | Cycling performance                                                                                                                                                   | Ref.               |
|---------------------|-------------------------------------|---------------------------------------------------|-----------------------------------------------------------------------------------------------------------------------------------------------------------------------|--------------------|
|                     |                                     |                                                   | Tests done at/Cycle number/Specific capacity                                                                                                                          |                    |
| 3DNP Si             | Chemical dealloying                 | 1.8 A g <sup>-1</sup> /~3550 mA h g <sup>-1</sup> | 1.8 A g <sup>-1</sup> /1500/1000 mA h g <sup>-1</sup>                                                                                                                 | <a href="#">1</a>  |
| nSi                 | Electrochemical alloying/dealloying | 0.6 A g <sup>-1</sup> /3342 mA h g <sup>-1</sup>  | 0.6 A g <sup>-1</sup> /400/699 mA h g <sup>-1</sup>                                                                                                                   | <a href="#">2</a>  |
| NP-Si               | Chemical dealloying                 | 0.2 C /~3400 mA h g <sup>-1</sup>                 | 1.0 C/100/2100 mA h g <sup>-1</sup>                                                                                                                                   | <a href="#">3</a>  |
| Porous Si           | Electrochemical alloying/dealloying | 0.2 A g <sup>-1</sup> /3343 mA h g <sup>-1</sup>  | 1.0 A g <sup>-1</sup> /500/1383 mA h g <sup>-1</sup>                                                                                                                  | <a href="#">4</a>  |
| Porous Si           | Chemical dealloying                 | 0.1 A g <sup>-1</sup> /3450 mA h g <sup>-1</sup>  | 0.1 A g <sup>-1</sup> /258/1368 mA h g <sup>-1</sup>                                                                                                                  | <a href="#">5</a>  |
| Cu-coated porous Si | Chemical dealloying                 | 0.2 A g <sup>-1</sup> /1925 mA h g <sup>-1</sup>  | 0.1 A g <sup>-1</sup> /150/1651 mA h g <sup>-1</sup>                                                                                                                  | <a href="#">6</a>  |
| NP-Si               | Vapor dealloying                    | 0.2 A g <sup>-1</sup> /3412 mA h g <sup>-1</sup>  | 1.0 A g <sup>-1</sup> /400/1180 mA h g <sup>-1</sup>                                                                                                                  | <a href="#">7</a>  |
| MPSi                | Chemical dealloying                 | 0.1 A g <sup>-1</sup> /2882 mA h g <sup>-1</sup>  | 1.0 A g <sup>-1</sup> /200/1846 mA h g <sup>-1</sup>                                                                                                                  | <a href="#">8</a>  |
| Nano Si             | Electrochemical alloying/dealloying | 1.0 A g <sup>-1</sup> /3230 mA h g <sup>-1</sup>  | 3.0 A g <sup>-1</sup> /300/1430 mA h g <sup>-1</sup>                                                                                                                  | <a href="#">9</a>  |
| 2DSi                | Vapor dealloying                    | 0.2 A g <sup>-1</sup> /2578 mA h g <sup>-1</sup>  | 1.0 A g <sup>-1</sup> /700/1514 mA h g <sup>-1</sup>                                                                                                                  | <a href="#">10</a> |
| Nanoporous Si       | Electrochemical alloying/dealloying | 1 A g <sup>-1</sup> /3276 mA h g <sup>-1</sup>    | 1.0 A g <sup>-1</sup> /800/1309 mA h g <sup>-1</sup><br>5.0 A g <sup>-1</sup> /1000/1012 mA h g <sup>-1</sup><br>7.0 A g <sup>-1</sup> /1000/823 mA h g <sup>-1</sup> | <b>This work</b>   |

**Table S3.** The calculated impedance parameters of ( $R_e$ ,  $R_{ct}$ ,  $\sigma$ , and  $D_{Li^+}$ ) the m-Si and np-Si-5 electrodes.

| Electrodes | $R_e$ ( $\Omega$ ) | $R_{ct}$ ( $\Omega$ ) | $\sigma$ ( $\Omega \text{ s}^{-1/2}$ ) | $D_{Li^+}$ ( $\text{cm}^2 \text{ s}^{-1}$ ) |
|------------|--------------------|-----------------------|----------------------------------------|---------------------------------------------|
| m-Si       | 17.9               | 237.6                 | 25.5                                   | $1.92 \times 10^{-12}$                      |
| np-Si-5    | 7.3                | 94.9                  | 7.3                                    | $2.33 \times 10^{-11}$                      |



## References

- 1 T. Wada, T. Ichitsubo, K. Yubuta, H. Segawa, H. Yoshida and H. Kato, *Nano Lett.*, 2014, **14**, 4505-4510.
- 2 Q. Ma, Z. Zhao, Y. Zhao, H. Xie, P. Xing, D. Wang and H. Yin, *Energy Storage Mater.*, 2021, **34**, 768-777.
- 3 T. Wada, J. Yamada and H. Kato, *J. Power Sources*, 2016, **306**, 8-16.
- 4 C. Zhang, Q. Ma, M. Cai, Z. Zhao, H. Xie, Z. Ning, D. Wang and H. Yin, *Waste Manag*, 2021, **135**, 182-189.
- 5 Z. Jiang, C. Li, S. Hao, K. Zhu and P. Zhang, *Electrochim. Acta*, 2014, **115**, 393-398.
- 6 C. Li, P. Zhang and Z. Jiang, *Electrochim. Acta*, 2015, **161**, 408-412.
- 7 Y. An, H. Fei, G. Zeng, L. Ci, S. Xiong, J. Feng and Y. Qian, *ACS Nano*, 2018, **12**, 4993-5002.
- 8 W. Cao, K. Han, M. Chen, H. Ye and S. Sang, *Electrochim. Acta*, 2019, **320**, 134613-134621.
- 9 Y. Yuan, W. Xiao, Z. Wang, D. J. Fray and X. Jin, *Angew. Chem., Int. Ed.*, 2018, **57**, 15743-15748.
- 10 Y. An, Y. Tian, C. Wei, H. Jiang, B. Xi, S. Xiong, J. Feng and Y. Qian, *ACS Nano*, 2019, **13**, 13690-13701.
